1     **The rise and the fall of a *Pseudomonas aeruginosa* epidemic lineage in a**  
2                                                             **hospital**

3 Marie Petitjean<sup>a,b</sup>, Paulo Juarez<sup>b</sup>, Alexandre Meunier<sup>a</sup>, Etienne Daguindau<sup>c</sup>,  
4 H  l  ne Puja<sup>b</sup>, Xavier Bertrand<sup>a,b</sup>, Benoit Valot<sup>b,d</sup>, and Didier Hocquet<sup>a,b,d,e,#</sup>

5 <sup>a</sup>Hygi  ne Hospitali  re, Centre Hospitalier Universitaire, 25030 Besan  on, France

6 <sup>b</sup>UMR CNRS 6249, Universit   de Bourgogne Franche-Comt  , 25030 Besan  on,  
7 France

8 <sup>c</sup>UMR INSERM 1098, Universit   de Bourgogne Franche-Comt  , 25030  
9 Besan  on, France

10 <sup>d</sup>Bioinformatique et Big Data au Service de la Sant  , UFR Science de la Sant  ,  
11 Universit   de Bourgogne Franche-Comt  , 25030 Besan  on, France

12 <sup>e</sup>Centre de Ressources Biologiques - Fili  re Microbiologique de Besan  on,  
13 Centre Hospitalier Universitaire, 25030 Besan  on, France

14

15 Didier Hocquet and Benoit are co-last authors and contributed equally to this  
16 work.

17 <sup>#</sup>To whom correspondence may be addressed. Email: [dhocquet@chu-](mailto:dhocquet@chu-besancon.fr)  
18 [besancon.fr](mailto:dhocquet@chu-besancon.fr)

19 **Keywords** : bacterial pathogens, high-risk clone, outbreak, parallel evolution

20 **Running title** : Intra-hospital evolution of an epidemic *P. aeruginosa*

21 **Word count for the abstract** : 250

22 **Word count for the text** : 4,988

## 23 **Abstract**

24 The biological features that allow a pathogen to survive in the hospital  
25 environment are mostly unknown. The extinction of bacterial epidemics in  
26 hospitals is mostly attributed to changes in medical practice, including infection  
27 control, but the role of bacterial adaptation has never been documented. We  
28 analyzed a collection of *Pseudomonas aeruginosa* isolates belonging to the  
29 Besançon Epidemic Strain (BES), responsible for a 12-year nosocomial  
30 outbreak, using a genotype-to-phenotype approach. Bayesian analysis estimated  
31 the emergence of the clone in the hospital five years before its opening, during  
32 the creation of its water distribution network made of copper. BES survived better  
33 than the reference strains PAO1 and PA14 in a copper solution due to a genomic  
34 island containing 13 metal-resistance genes and was specifically able to  
35 proliferate in the ubiquitous amoeba *Vermamoeba vermiformis*. Mutations  
36 affecting amino-acid metabolism, antibiotic resistance, lipopolysaccharide  
37 biosynthesis, and regulation were enriched during the spread of BES. Seven  
38 distinct regulatory mutations attenuated the overexpression of the genes  
39 encoding the efflux pump MexAB-OprM over time. The fitness of BES decreased  
40 over time in correlation with its genome size. Overall, the resistance to inhibitors  
41 and predators presumably aided the proliferation and propagation of BES in the  
42 plumbing system of the hospital. The pathogen further spread among patients via  
43 multiple routes of contamination. The decreased prevalence of patients infected  
44 by BES mirrored the parallel and convergent genomic evolution and reduction

45 that affected bacterial fitness. Along with infection control measures, this may  
46 have participated in the extinction of BES in the hospital setting.

47 **Importance**

48 Bacterial pathogens are responsible for nosocomial outbreaks, but the sources of  
49 contamination of the hospitals are mostly unclear and the role of bacterial  
50 evolution in the extinction of outbreaks has never been considered. Here, we  
51 found that an epidemic strain of the pathogen *Pseudomonas aeruginosa*  
52 contaminated the drinking water network of a hospital due to its tolerance to  
53 copper and predatory amoeba, both present in the water pipes. The extinction of  
54 the outbreak occurred concomitantly with parallel and convergent genome  
55 evolution and a reduction in the size of the bacterial genome that correlated with  
56 the fitness of the pathogen. Our data suggest that pathogen evolution  
57 participated in the extinction of an outbreak in a hospital setting.

## 58 **Introduction**

59 The epidemic curves of bacterial pathogens in hospitals are mostly wave-  
60 shaped, with a rapid increase in cases followed by a slower decline (1). During  
61 pathogen outbreaks in hospital settings, patients are infected directly or  
62 indirectly, either from the environment or from other patients. However, the exact  
63 source of the outbreak (e.g. a patient, a healthcare worker, the environment) is  
64 almost never documented and often limited to the identification of an index case  
65 due to the lag between contamination of the healthcare setting and detection of  
66 the pathogen in the index case (2, 3). Aside from antibiotic resistance, the  
67 biological features that allow a pathogen to enter and survive in the aggressive  
68 hospital environment are mostly unknown. However, genomic analyses are able  
69 to estimate the origin of an outbreak by calculating the time of emergence of the  
70 most recent common ancestor and the genetic features that could have favored  
71 its expansion (4, 5).

72 Whole-genome sequencing analysis has already been used to identify genetic  
73 elements gained, lost, or mutated during outbreaks of bacterial pathogens, but  
74 the phenotypic consequences of such mutations are rarely determined (6-8).  
75 Other studies have illustrated the difficulty of phenotypically confirming *in silico*  
76 predictions (9). Although the extinction of epidemics in hospitals is mostly  
77 attributed to infection control or more widely to changes in medical practice (10),  
78 the role of bacterial adaptation has never been considered.

79 We addressed this question by exploring the genotypic and phenotypic variations  
80 of an epidemic strain of *P. aeruginosa* that infected more than 250 patients over

81 12 years in a single hospital (2). *P. aeruginosa* is a ubiquitous Gram-negative  
82 species that exhibits such genomic plasticity that it allows its adaptation to a  
83 variety of niches, from the wild environment to that of disinfected hospitals and  
84 patients treated with antibiotics (11). This opportunistic pathogen is a leading  
85 cause of nosocomial infections, as well as chronic lung infections in cystic  
86 fibrosis (CF) patients (12). In addition to its high intrinsic resistance to a wide  
87 variety of antibiotics, *P. aeruginosa* can readily acquire resistance through  
88 mutations or horizontal transfer of resistance determinants. Thus, resistance to  
89 all currently available anti-pseudomonal antibiotics is frequent (13), justifying its  
90 inclusion in the list of serious threats by the CDC (14). *P. aeruginosa* is frequently  
91 responsible for outbreaks in the hospital setting, in which the source of  
92 contamination is mostly unknown or speculated, at best (3). Water points-of-use  
93 have often been incriminated in *P. aeruginosa* hospital outbreaks. However,  
94 sinks are themselves seeded by clones of human origin, blurring the tracks back  
95 to the source of hospital contamination (15).

96 We used WGS analysis and a genotype-to-phenotype approach of such a long-  
97 term outbreak of *P. aeruginosa* as a model to (i) date the true origin of the  
98 contamination of the hospital, (ii) identify the biological features that favored its  
99 installation, (iii) identify parallel and convergent evolution selected during the  
100 outbreak, and (iv) correlate the fitness of the strain with its genomic evolution.

## 101 **Results and discussion**

### 102 ***Population structure and most recent common ancestor of P. aeruginosa***

103 **BES.** Between May 1997 and April 2008, 276 patients were infected with the  
104 *P. aeruginosa* BES in the University Hospital of Besançon (Fig. 1A). We  
105 sequenced the full genomes of 54 isolates (retrieved from 54 patients) evenly  
106 distributed over time and considered to be representative of the outbreak (Table  
107 S1). *In silico* MLST showed the sequenced isolates to belong to the widespread  
108 clone ST395 (16). Phylogenetic analysis using 285 SNPs in the core genome  
109 showed that BES isolates fell into the two major clades, 1 and 2, with clade 1  
110 being divided into four sub-clades, 1a to 1d (Fig. 1B). There was no clear link  
111 between the date of isolation or hospital ward and position in the phylogenetic  
112 tree (Table S1). Although no environmental sampling was made during the  
113 outbreak, clade 1b in the phylogenetic tree probably grouped isolates from  
114 patients contaminated from a common environmental reservoir. In addition, stair-  
115 shaped branches (e.g. clade 1c) indicated probable patient-to-patient  
116 transmission. Although the pulsed-field gel electrophoresis pattern of BES  
117 isolates was the same (2), WGS analysis showed two hidden parallel outbreaks  
118 simultaneously occurring in the same hospital (Fig. 1B), as already observed for  
119 other Gram-negative pathogens (17). The dating of emergence of the clone  
120 ST395 at the hospital required the calculation of the clock rate of our ST395  
121 population, that was estimated to be  $3.96 \times 10^{-6}$  mutations per site per year by  
122 Bayesian analysis (95% highest posterior density,  $3.08 \times 10^{-6}$  -  $4.96 \times 10^{-6}$ ),  
123 which is higher than that estimated for the *P. aeruginosa* species (18). With the

124 addition of an ST395 outgroup isolate retrieved in our hospital, but not belonging  
125 to BES, to the database (Table S1), Bayesian analysis dated the putative  
126 common ancestor that linked the ST395 isolates from our hospital to 1990 (95%  
127 confidence interval [CI] = 1987-1993), seven years before its first isolation from a  
128 patient in May 1997. Furthermore, using an external ST395 outgroup isolated  
129 from the hospital of Birmingham (United Kingdom), we estimated the emergence  
130 of clone ST395 at the hospital in 1978 (95% CI = 1970-1985) (Fig. 1B) during the  
131 creation of the water distribution network. The introduction of ST395 during the  
132 construction of a hospital was already suspected in the United Kingdom (3). This  
133 is consistent with the frequent isolation of the ST395 clone in water (19, 20) and  
134 the probable role of drinking water as a source of *P. aeruginosa* infection (21,  
135 22). Overall, the ST395 clone has presumably contaminated the water network of  
136 the hospital before its opening but the pathogen further spread among patients  
137 by other routes of transmission (e.g. contact with the environment, other patients,  
138 or healthcare workers).

139

140 ***BES P. aeruginosa is tolerant to copper.*** The date of emergence of the  
141 common ancestor of ST395 (1978) led us to suspect the water distribution  
142 system of our hospital as the source of the outbreak. The water distribution and  
143 plumbing systems of our hospital are made of copper and are hostile  
144 environments for bacterial development, with nutrient-poor conditions, inhibitors  
145 (e.g. chlorine and copper-ions), and predators (free-living amoeba). We therefore  
146 postulated that BES could cope with those harsh conditions. Analysis of the BES



147 genome sequences identified a 37-kb genome island (GI) that harbored an array  
148 of thirteen genes encoding copper transporters (Fig. S1) in all isolates of BES  
149 (23). This GI shared 99.7% identity with GI-7 of a *P. aeruginosa* ST308 copper-  
150 tolerant strain (24), also retrieved from water networks of hospitals. We  
151 phenotypically confirmed that the representative isolate BES-4 survived better  
152 than the *P. aeruginosa* reference strains PAO1 and PA14 (Fig. 2A) in a 150 µg/L  
153 copper (II) sulphate solution, corresponding to the highest copper concentration  
154 retrieved in the drinking water of our hospital (24). We then tested the mutant  
155 strain BES-4ΔGI-7, deleted of the entire sequence of GI-7 by chromosomal  
156 recombination, under the same conditions to confirm the role of GI-7 in the  
157 tolerance of BES-4 to copper in solution. The deletion of GI-7 decreased the  
158 tolerance to copper of the BES strain relative to its wildtype parent, reducing it to  
159 that of the comparators PAO1 and PA14 (Fig. 2A). However, the tolerance to  
160 copper-ions under these conditions was not fully specific to GI-7, as the  
161 representative of the high-risk clone ST235 (isolate PA1646, without GI-7)  
162 showed copper tolerance similar to that of BES-4 (Fig. 2A). However, no ST235-  
163 specific determinants for tolerance to copper-ions have been identified (25).  
164 Interestingly, a sampling campaign in 2017 found that the same water distribution  
165 network was contaminated by a GI-7 containing ST308 clone (24). Overall, these  
166 results confirm that GI-7 can help waterborne *P. aeruginosa* (ST308, ST395) to  
167 tolerate copper in solution.

168

169 **BES *P. aeruginosa* proliferates in free-living amoebae.** Protozoans are  
170 predators for bacteria in water (26). *Vermamoeba (Hartmannella) vermiformis* is  
171 ubiquitous in drinking-water systems and resistant to commonly used disinfection  
172 methods (27). It has already been shown that a strain of *P. aeruginosa* isolated  
173 from the water of a hospital can resist *V. vermiformis* grazing (28). We thus  
174 tested the survival of BES-4 in the reference strain of *V. vermiformis* 172A versus  
175 that of the same controls used to test copper tolerance to further investigate  
176 whether this mechanism may contribute to the resistance of *P. aeruginosa* BES  
177 in the drinking-water network. BES better resisted the grazing of this protozoan  
178 than the comparators and was even able to proliferate inside the amoeba (Fig.  
179 2B). Copper resistance has been implicated in the tolerance to amoeba, but the  
180 deletion of GI-7 had no effect on grazing resistance (29) (Fig. 2B). The resistance  
181 mechanism of BES to protozoan grazing is therefore yet unknown. Hence,  
182 protozoans were presumably responsible for the proliferation and propagation of  
183 BES in the water system and, as already demonstrated for *Legionella*  
184 *pneumophila*, the intracellular environment protected the bacterial pathogen from  
185 chlorine disinfection (30). However, such resistance to protozoan grazing could  
186 have broader consequences. Pathogens use related strategies for intracellular  
187 survival in both amoeba and human macrophages, which in turn share similar  
188 phagocytic mechanisms. Consequently, the coincidental evolution hypothesis  
189 suggests that virulence factors arose as a response to other selective pressures,  
190 such as predation, rather than for virulence *per se* (31).

191 Overall, the resistance to an inhibitor (copper) and a predator (free-living  
192 amoeba) presumably aided the proliferation and propagation of *P. aeruginosa*  
193 BES in the plumbing system during the building of the hospital, five years before  
194 its opening. This finding stresses the need for strict adherence to the procedures  
195 of commissioning water systems in healthcare premises (32).

196

197 ***Biological functions altered during the 12-year spread of P. aeruginosa***  
198 ***BES.*** After having identified the likely source of contamination of the hospital  
199 building and the associated biological features, we explored the evolution of BES  
200 during its spread. During their interaction with humans, bacterial pathogens can  
201 accumulate mutations, allowing them to better adapt to the host, evade the  
202 immune response, or increase their resistance to antibiotics (33). Our collection  
203 covered the 12-year epidemic and enabled the identification of parallel evolution  
204 of the same strain in multiple individuals. We then searched for biological  
205 features selected or lost during the outbreak. Variant calling retrieved 458 SNPs  
206 across the BES population, amongst which 220 were non-synonymous or  
207 present in the promoting regions of genes (Table S3). Among them, 68 mutations  
208 affected 55 genes encoding proteins for which the function was known. We  
209 compared the proportion of altered functions in early and late isolates and  
210 identified four major functions that were affected ( $\chi^2$  test,  $P < 0.05$ ): amino-acid  
211 metabolism, antibiotic resistance, lipopolysaccharide (LPS) biosynthesis, and  
212 regulation.

213 Specific modifications occurred in genes involved in amino-acid metabolism. This  
214 was particularly observed in late isolates. The genes *hutG* and *trpS* were both  
215 mutated in the last six isolates of clade 1d, whereas the late isolates of clade 1a  
216 harbored mutated *asnB*, and those of clade 2 mutations in *trpB* (Fig. 1B). It has  
217 been predicted that mutations in *hutG* and *asnB* impair the metabolism of  
218 histidine and asparagine, respectively, and that *trpS* and *trpB* mutants contribute  
219 to the deficient synthesis of tryptophan (34). Surprisingly, substitution D32N in  
220 TrpB independently occurred in late isolates of clade 2 (Fig. 1B). Convergent  
221 evolution towards auxotrophy has been frequently described in CF isolates as a  
222 result of niche specialization (35), presumably leading to an epidemiological dead  
223 end (36). However, the mutations in amino-acid metabolism did not change the  
224 growth of the isolates of BES in minimal media containing asparagine or histidine  
225 as the sole carbon source (Fig. S2). This may be due to compensatory mutations  
226 in unannotated genes or the existence of alternative pathways for amino-acid  
227 metabolism.

228 The biosynthetic pathway of LPS is encoded by several genes responsible for  
229 the biosynthesis of lipid A, O-antigen, and transport towards the outer membrane  
230 (37). Eleven isolates, of which 10 were late isolates, displayed parallel evolution  
231 affecting genes known to be involved in LPS biosynthesis, either in O-antigen  
232 assembly (*rmlA*), LPS export (*lptF*, *lptH*), or lipid A biosynthesis (*htrB1*, *arnD*)  
233 (Fig. 1B). Serotyping confirmed that most (7 of 11) of these isolates were  
234 polyagglutinable, resulting in an altered LPS. This contrasted with all the other  
235 isolates of BES, for which serotype O:6 was found (Fig. 1B). LPS structures can

236 be modified in response to environmental pressures (e.g. divalent cations,  
237 antimicrobial peptides) and surface interactions. Modification of the LPS of  
238 *P. aeruginosa* is an important factor in the adaptation of this pathogen to chronic  
239 infection. Hence, reduced LPS immunostimulatory potential, due to lipid A  
240 modification (in isolates BES-27, -44, -45, -46, and -48; Fig. 1B), may contribute  
241 to evasion of the immune system and thus the survival of the pathogen over the  
242 course of a chronic infection (38). However, LPS extracted from all the isolates of  
243 BES stimulated human peripheral blood mononuclear cells with the same  
244 intensity (Fig. S3).

245

#### 246 ***Evolution of antibiotic resistance during the spread of P. aeruginosa BES.***

247 Early isolates of BES were classified as multidrug-resistant (39), with decreased  
248 susceptibility to aminoglycosides (gentamicin, tobramycin), fluoroquinolones  
249 (ciprofloxacin), and  $\beta$ -lactam compounds (40). Such decreased susceptibility may  
250 be explained by chromosomal mutations in resistance-associated genes. Indeed,  
251 early isolates harbored *ant(2'')*-*la*, coding for a 2''-aminoglycoside nucleotidyl-  
252 transferase that is involved in aminoglycoside resistance. Moreover,  $\beta$ -lactam  
253 resistance can be explained by observed mutations in the regulating genes  
254 *ampR* (M1L in AmpR) and *ampD* (A134V and T139M in AmpD), responsible for  
255 increased production of the cephalosporinase AmpC and alterations in *mexR*  
256 (H107P in MexR), a regulator of the multi-drug efflux pump MexAB–OprM.  
257 Finally, all isolates also displayed canonical mutations in the quinolone-  
258 resistance determining regions of GyrA (T83I) and ParC (S87L), explaining the

259 increased resistance to fluoroquinolones. BES did not acquire foreign resistance  
260 determinants during the outbreak. Sequence analysis of three early and 10 late  
261 isolates showed three different mutations in *oprD* (Fig. 1B) that correlated with  
262 higher resistance to imipenem (Welch Two Sample Test,  $P = 2.5 \times 10^{-5}$ ).  
263 Resistance to carbapenem via OprD mutation, certainly favored by antibiotic  
264 treatment, has been shown to enhance fitness *in vivo* and to facilitate mucosal  
265 colonization and dissemination to the spleen (41).

266

267 **Modulation of mexAB-OprM overexpression.** The resistance-nodulation-  
268 division efflux pump MexAB–OprM is expressed at basal levels by wildtype cells  
269 and regulated by a complex regulatory network of at least 10 direct or indirect  
270 regulators (42) (Fig. 3A). Early isolates displayed an alteration of the DNA-  
271 binding domain of the repressor protein MexR (H107P, substituting the polar  
272 histidine with the non-polar proline). This resulted in the overexpression of *mexB*  
273 relative to that of the PAO1 reference strain (Fig. 3B) and contributed to  
274 enhanced resistance to the MexAB-OprM substrates aztreonam and  
275 ciprofloxacin (Fig. S4) (43). Other mutations in MexAB-OprM-regulating regions  
276 arose independently during the spread of BES and were found in 19 of the 27  
277 late isolates. Hence, 12 isolates of BES carried non-synonymous mutations in  
278 *mexR*, *cpxR*, or *nalD*, and seven had mutations in the promoter region of the  
279 *mexAB-oprM* operon (Fig. 3A). We verified the impact of these mutations on the  
280 expression of the efflux pump by measuring *mexB* expression in all isolates of  
281 BES by RT-qPCR. Almost all the isolates (29 of 31, 94%) that had the same

282 mutations in the *mexAB-oprM* regulation pathway as BES-1 overexpressed  
283 *mexB* (median value, 4.3; Fig. 3B). Ten late isolates with a H107P MexR  
284 background had undergone three types of mutations in the regulator CpxR (Fig.  
285 3A), leading to an intermediate level of *mexB* expression (median value, 3.0; Fig.  
286 3B). Moreover, 11 isolates harbored mutations in the *mexA-mexR* intergenic  
287 region (MexR binding site, and *mexA* RBS region) or had a P107S substitution in  
288 MexR (returning a polar amino acid – serine – to position 107), expressed *mexB*  
289 at a level similar to that of the reference strain PAO1 (median value, 0.7; Fig.  
290 3B). Efflux expression, as measured by *mexB* expression, also decreased over  
291 time (Fig. 3C).

292 Overall, seven distinct regulatory mutations attenuated the initial *mexAB-oprM*  
293 overexpression of BES (Fig. 3A). MexAB-OprM plays a role in antibiotic  
294 resistance, but can also export virulence determinants that allow *P. aeruginosa* to  
295 be invasive and cause infection (44). The attenuation of *mexAB-oprM*  
296 overexpression has been shown to reduce the invasiveness of the bacteria in a  
297 cell model (45). It is thus possible that convergent evolution decreasing the  
298 overproduction of this pump contributed to the persistence of BES in hospitalized  
299 patients. Moreover, the overexpression of *mexAB-oprM* reduces the survival of  
300 *P. aeruginosa* in the environment (46). As expected, attenuation of the  
301 overexpression of *mexAB-oprM* in late isolates reduced the level of resistance to  
302 aztreonam and ciprofloxacin (Fig. S4). The regulatory mutations in BES  
303 contrasted with the alterations in *mexAB-oprM* genes that are selected in  
304 *P. aeruginosa* populations in CF airways, leading to hypersensitivity to antibiotics

305 (47). A functional MexAB-OprM pump is necessary for the full virulence of  
306 *P. aeruginosa* in cell models (48). However, its overproduction has no effect on  
307 the invasiveness of the pathogen, advocating against the enhanced survival of  
308 MexAB-OprM-overproducing mutants in protozoans (45). This fine-tuning of  
309 *mexAB-oprM* expression possibly allows a trade-off between antibiotic  
310 resistance, virulence, and survival in the environment. Such efflux modulation  
311 may then be important for survival and persistence of the clone in hospital  
312 setting.

313

314 **Insertion or deletion of gene blocks during the spread of BES.** *P. aeruginosa*  
315 can evolve through the acquisition or loss of genome fragments (6). Accessory  
316 gene profiling showed clear differences in accessory gene content among  
317 isolates, with gene blocks specific to certain clusters (Table S4). For example,  
318 isolates BES-1 and BES-28, which were retrieved four years apart and belonged  
319 to different clades, independently underwent a ca. 130-kb deletion, including  
320 genes encoding quorum-sensing regulators (LasI, LasR, and RsaL) and the  
321 flagellar operon region *fli* (23). The late isolate BES-52 lost a 278-kb fragment  
322 that encompassed *hmgA*, of which deletion leads to an easily recognizable  
323 brown colony phenotype due to homogentisate accumulation. These  
324 melanogenic mutants are probably adapted to life in diverse bacterial  
325 communities in chronically-infected patients (49). Despite the relatively high  
326 plasticity observed throughout the outbreak, the decrease over time in the  
327 number of genes per genome was not statistically significant (Spearman



328 correlation test,  $P = 0.064$ ; Fig. S5). The epidemiology of *P. aeruginosa* BES at  
329 our hospital (Fig. 1A) supports the idea of emergence and extinction over time.  
330 As genome reduction can alter the bacterial growth rate (50), we evaluated the  
331 fitness of each BES isolate by coculturing them with an early representant of  
332 BES and measuring by qPCR the proportion of each competitor after 48 h of  
333 incubation. Coculture was preferred since it permits detection of fitness  
334 differences that are  $\leq 1\%$  per generation, undetectable through the assessment  
335 of growth rates in single culture (51). Indeed, the fitness of BES decreased over  
336 time (Fig. 4A) and correlated with the size of the genome (Fig. 4B). More  
337 specifically, non-O:6 isolates ( $n = 7$ ) showed lower fitness in coculture than O:6  
338 isolates (Welch two-sample test,  $P = 0.012$ ).

339

340 **Limitations and strengths.** This study had several limitations. Although we  
341 selected randomly distributed isolates throughout the period of the outbreak, the  
342 selection and inclusion criteria were not systematic and dependent on the  
343 availability of the isolates. Thus, the data presented here may be affected by a  
344 sampling bias that could have obscured epidemiological and evolutionary  
345 signals. This retrospective study did not allow water sampling at the time of  
346 emergence of the clone in the hospital (ca. 1978) that could have showed water  
347 contamination with BES and *V. vermiformis*. However, others have showed that  
348 *V. vermiformis* is endemic in hospital plumbing systems (52).

349 Here, we made use of a rare and valuable resource (*i.e.* longitudinally collected  
350 isolates from a variety of infection types in a single hospital from a period of more

351 than a decade). While adaptation of human pathogens within a single niche has  
352 been described for evolution *in vitro*, very little research has focused on bacterial  
353 adaptive processes within the course of an outbreak. We attempted to validate *in*  
354 *silico* predictions by wet lab experiments. Hence, our genotype-to-phenotype  
355 approach correlated tolerance to copper, resistance to antibiotics, modulation of  
356 the expression of efflux pump, and bacterial fitness with genome content.  
357 However, sequence analysis predicted auxotrophy for tryptophan and impaired  
358 growth in histidine and asparagine, which were not confirmed *in vitro*. This  
359 highlights the need to control the functional effects of the mutations observed in  
360 WGS data.

361

362 **Conclusions.** This whole-genome phylogenetic analysis of a *P. aeruginosa*  
363 outbreak suggests contamination of the water distribution system before the  
364 opening of the hospital with the widespread clone of *P. aeruginosa* ST395. Its  
365 resistance to copper and protozoans presumably helped the strain to survive in  
366 the water distribution system. Although BES has presumably contaminated the  
367 water network of the hospital before its opening, it further spread among patients  
368 by other routes of transmission. The prevalence of patients infected by the  
369 epidemic clone ST395 started to decrease in 2001, concomitantly with parallel  
370 and convergent evolution. Indeed, independent mutations affected the amino-  
371 acid metabolism pathways, led to the loss of porin OprD, and altered the LPS  
372 synthesis pathway. It also modulated the overexpression of the efflux pump  
373 MexAB-OprM, of which its fine-tuning may be important for survival and

374 persistence of the clone. We found that the fitness of BES decreased over time,  
375 in correlation with genome length. The parallel adaptation of the ST395 isolates  
376 to patients may have decreased its resistance to the environment and thereby its  
377 patient-to-patient transmissibility. This, along with the implemented infection  
378 control measures, may have contributed to the extinction of this epidemic  
379 pathogen in a hospital setting.

## 380 **Materials and Methods**

381 ***Hospital setting and isolate collection.*** A prolonged outbreak of *P. aeruginosa*  
382 in the University Hospital of Besançon, a 1,300-bed teaching hospital in France,  
383 was investigated. The construction of its facilities began in 1978 and the main  
384 building was commissioned in 1983, with all pipes of the drinking-water  
385 installation being made of copper. All *P. aeruginosa* isolates retrieved from  
386 patients hospitalized between May 1997 and April 2008 were typed by pulsed  
387 field gel electrophoresis (PFGE) to assess the number of infected patients.  
388 Patients with *P. aeruginosa* isolates for which the pulsotype shared the same  
389 band profile with the index case ( $n = 276$ ) were included in the cohort (2). None  
390 of them suffered from cystic fibrosis. Then, 54 isolates retrieved from 54 patients  
391 (BES-1 to BES-54) were selected for sequencing. They were evenly distributed  
392 over time and considered to be representative of the outbreak (Table S1). The  
393 first 27 isolates were recovered in the early stages of the outbreak (before  
394 January 2001) and the other 27 isolates were considered to be late isolates  
395 (Table S1).

396 ***DNA sequencing and analysis.*** Bacterial DNA was isolated from overnight  
397 cultures on Mueller-Hinton agar using the Genomic-tip kit (Qiagen) and paired-  
398 end sequenced with Illumina NextSeq, at 2 x 150 bp. Reads were subsampled  
399 before assembly to limit the coverage to 80X. The contigs were built with SPAdes  
400 (53). Local and external outgroup isolates of *P. aeruginosa* of the same  
401 sequence type (ST) were used to root the phylogenetic tree (Table S1) (3). We  
402 previously sequenced BES-1, the first clinical isolate of BES identified in May

403 1997, using PacBio technology and used it as a reference (23). STs were  
404 determined *in silico* using the PubMLST database (<https://pubmlst.org/>) and the  
405 homemade pipeline pyMLST (<https://github.com/bvalot/pyMLST>). The BES  
406 pangenome was built by combining the BES-1 circular genome with non-  
407 redundant contigs from the other BES isolates using the Ragout tool (54). For  
408 this purpose, the assemblies of each BES isolate were aligned against the BES-1  
409 genome using Mummer (55). Genes of the BES pangenome were detected using  
410 Prodigal and then annotated with BLAST (56, 57). Resistance and virulence  
411 genes were sought using ResFinder and the Virulence Factor DataBase,  
412 respectively (58, 59). The reads from all isolates were then aligned against the  
413 BES pangenome using BWA and the alignments used for further analysis  
414 (<https://github.com/lh3/bwa>). The presence or absence of each gene was tested  
415 using FeatureCounts (60). SNPs were identified using freebayes with a minimum  
416 coverage of 10 reads per isolate and a minimum quality of 30  
417 (<https://github.com/ekg/freebayes>). Non-synonymous SNPs and SNPs in  
418 promoter regions (RBS and promoter sequences at -10 and -35) were further  
419 sorted. SNPs and gained or lost gene blocks were clustered in relation to the  
420 phylogenetic tree with MixOmics (61). IS insertion events were detected using  
421 panISa software (62). The boundaries of each potential IS were sought in the  
422 BES-1 genome to exclude chromosomal rearrangement before searching for  
423 them in the BES genomes to assess the length of the potential ISs. The  
424 presence of the potential IS was confirmed by PCR and sequencing with specific  
425 IS1 and IS2 primers (Table S2).

426 **Phylogeny and Most Recent Common Ancestor (MRCA) calculation.** The  
427 265 core genes of the BES isolates that harbored at least one SNP were  
428 concatenated for phylogenetic analysis, producing a 397,062-bp alignment with  
429 285 SNPs. MrBayes software was used to build the maximum clade credibility  
430 tree (63). The isolation dates of the BES and outgroup isolates were used as  
431 calibration nodes to calculate the age of the MRCA.

432 **RT-qPCR experiments.** *mexB* expression was assessed in all BES isolates by  
433 RT-qPCR as previously described (43) with specific primers for the  
434 housekeeping gene *rpsL*, and *mexB* (Table S2). After each assay, a dissociation  
435 curve confirmed the specificity of all PCR amplicons. The mRNA levels of *mexB*  
436 were normalized to that of the reference gene *rpsL* and expressed as a ratio to  
437 the levels in the reference strain *P. aeruginosa* PAO1. Based on previous results,  
438 all BES isolates with at least two-fold higher *mexB* expression than that in PAO1  
439 were considered to be MexAB-OprM overproducers (43).

440 **Phenotype determination.** Susceptibility to antipseudomonal compounds was  
441 tested using agar dilution, as recommended by the CLSI (64). We determined the  
442 serotype of all isolates with specific antiserum (Bio-Rad). Metabolic changes in  
443 BES isolates were assessed using procedures detailed in Fig. S2.

444 **Survival of the BES-4 isolate and its  $\Delta$ GI-7 mutant in a copper solution.** For  
445 all tested *P. aeruginosa* isolates, an overnight culture in Luria-Bertani broth (LBB,  
446 Bio-Rad) was diluted 1/200 into fresh LBB and further incubated at 37°C with  
447 gentle shaking until mid-log phase. The bacterial suspension was centrifuged

448 and the pellet was washed once and resuspended in sterile deionized water. A  
449 150 µg/L copper (II) sulphate solution (Sigma-Aldrich) was inoculated with  
450 approximately  $10^8$  bacteria before incubation for 24 h at 22°C in the dark. The  
451 concentration of 150 µg/L was chosen as it was the highest value retrieved in the  
452 drinking water of our hospital (24). Initial and final bacterial concentrations were  
453 determined by plating appropriate dilutions on LB agar (Bio-Rad) and incubating  
454 overnight at 37°C. The ratios of the initial and final bacterial concentrations  
455 determined the survival rates. We repeated each experiment six times  
456 independently for all isolates. The reference strains of *P. aeruginosa* PAO1  
457 (ST549), PA14 (ST235), and a clinical isolate of ST235 (strain PA1646)(24) were  
458 used as controls.

459 ***Survival of P. aeruginosa in free-living amoebae.*** The survival and growth of  
460 the BES strain was evaluated in the free-living amoeba *Vermamoeba*  
461 *vermiformis* 172A, isolated from the drinking water installation of the Lausanne  
462 Hospital (Switzerland) (65). The protozoans were grown in PYNFH medium (LGC  
463 standards, Molsheim, France) as monolayers at 25°C before their harvest.  
464 *P. aeruginosa* strains were cultured on Mueller–Hinton agar (MHA) for 24 h at  
465 37°C, harvested, and then suspended in PAS. Briefly,  $1.5 \times 10^5$  amoebae were  
466 incubated with *P. aeruginosa* at a MOI of 5 (five times more bacteria) for 4 h at  
467 25°C. Non-internalized bacteria were then killed by a 2-h incubation with 0.3  
468 mg.ml<sup>-1</sup> amikacin. The co-cultures were washed three times with PAS to remove  
469 the antibiotic and further incubated in PYNFH for 24 h at 25°C. We then lysed the  
470 amoebae with 0.4% Triton X100 for 30 min at 25°C. Appropriate dilutions of the

471 initial and final bacterial inoculum were plated on MHA plates to calculate the  
472 proportion of surviving bacterial cells.

473 **Chromosomal deletion of the genomic island GI-7.** The GI-7 region was  
474 deleted from isolate BES-4 using overlapping PCR and homologous  
475 recombination detailed elsewhere (24).

476 **BES coculture.** Mid-log phase BES isolates were co-cultured in LBB at a 1:1  
477 ratio against the mutant BES-4 $\Delta$ GI-7 as a reference. We extracted and purified  
478 the DNA (QIAamp DNA Mini Kit, Qiagen) from 48-h co-cultures. DNA  
479 concentrations were determined using QUBIT 2.0 and adjusted to 0.1 ng/ $\mu$ l. The  
480 *mutL* (present in all isolates) and *copB* (specifically absent from BES-4 $\Delta$ GI-7)  
481 genes were quantified using specific primers and Taqman probes against  
482 standard curves (Table S2). qPCR was performed on a 7500 Fast Real Time  
483 PCR system and the results analyzed using 7500 software v 2.3 (Applied  
484 Biosystems). The competition index (CI, proportion of the tested BES isolate in  
485 the co-culture after 48 h of incubation) was calculated as the ratio of the  
486 concentrations of *copB* and *mutL*. In other words, a CI of 0.5 was neutral. The CI  
487 of BES-4 against BES-4 $\Delta$ GI-7 was  $0.53 \pm 0.01$ , indicating that the deletion of GI-  
488 7 did not alter bacterial fitness.

489 **Data availability.** All genomic data were deposited in NCBI under the project  
490 accession number PRJNA399056. Biosample details are given in the Table S1.

491

492



493 **Supplemental material**

494           Figures S1 to S5

495           Tables S1 to S4

496

497 **Acknowledgments**

498 We thank Marilou Bourgeon for her technical support and Catherine Llanes and  
499 Thilo Köhler for helpful discussions. We also thank Dr Beryl Oppenheim for the  
500 gift of a ST395 isolate from the Queen Elizabeth Hospital, Birmingham, UK.  
501 Computations were performed at the Mésocentre de Calculs de Franche-comté  
502 (Besançon, France).

503 X.B., B.V., and D.H. designed the research; M.P., P.J., A.M., H.P., and B.V.  
504 performed the research; B.V. contributed new reagents/analytical tools; M.P.,  
505 P.J., E.D., B.V., and D.H. analyzed the data; and M.P., P.J., X.B., B.V., and D.H.  
506 wrote the paper.

507 This work was supported by a grant from the Région de Franche-Comté and  
508 from the University Hospital of Besançon, France (API 3A – Promes 2013) to  
509 M.P., the French “Ministère de l'Enseignement Supérieur et de la Recherche to  
510 P.J., and the Région Bourgogne Franche-Comté to H.P. The funders had no role  
511 in the study design, data collection or analysis, decision to publish, or preparation  
512 of the manuscript. Ethical approval was not required for this study.

513 **References**

- 514 1. Otter JA, Doumith M, Davies F, Mookerjee S, Dyakova E, Gilchrist M,  
515 Brannigan ET, Bamford K, Galletly T, Donaldson H, Aanensen DM,  
516 Ellington MJ, Hill R, Turton JF, Hopkins KL, Woodford N, Holmes A. 2017.  
517 Emergence and clonal spread of colistin resistance due to multiple  
518 mutational mechanisms in carbapenemase-producing *Klebsiella*  
519 *pneumoniae* in London. *Sci Rep* 7:12711.
- 520 2. Bertrand X, Bailly P, Blasco G, Balvay P, Boillot A, Talon D. 2000. Large  
521 outbreak in a surgical intensive care unit of colonization or infection with  
522 *Pseudomonas aeruginosa* that overexpressed an active efflux pump. *Clin*  
523 *Infect Dis* 31:E9-E14.
- 524 3. Quick J, Cumley N, Wearn CM, Niebel M, Constantinidou C, Thomas CM,  
525 Pallen MJ, Moïemen NS, Bamford A, Oppenheim B, Loman NJ. 2014.  
526 Seeking the source of *Pseudomonas aeruginosa* infections in a recently  
527 opened hospital: an observational study using whole-genome sequencing.  
528 *BMJ Open* 4:e006278.
- 529 4. Eppinger M, Pearson T, Koenig SS, Pearson O, Hicks N, Agrawal S,  
530 Sanjar F, Galens K, Daugherty S, Crabtree J, Hendriksen RS, Price LB,  
531 Upadhyay BP, Shakya G, Fraser CM, Ravel J, Keim PS. 2014. Genomic  
532 epidemiology of the Haitian cholera outbreak: a single introduction  
533 followed by rapid, extensive, and continued spread characterized the  
534 onset of the epidemic. *mBio* 5:e01721.

- 535 5. Merker M, Blin C, Mona S, Duforet-Frebourg N, Lecher S, Willery E, Blum  
536 MG, Rusch-Gerdes S, Mokrousov I, Aleksic E, Allix-Beguec C, Antierens  
537 A, Augustynowicz-Kopec E, Ballif M, Barletta F, Beck HP, Barry CE, 3rd,  
538 Bonnet M, Borroni E, Campos-Herrero I, Cirillo D, Cox H, Crowe S, Crudu  
539 V, Diel R, Drobniowski F, Fauville-Dufaux M, Gagneux S, Ghebremichael  
540 S, Hanekom M, Hoffner S, Jiao WW, Kalon S, Kohl TA, Kontsevaya I,  
541 Lillebaek T, Maeda S, Nikolayevskyy V, Rasmussen M, Rastogi N,  
542 Samper S, Sanchez-Padilla E, Savic B, Shamputa IC, Shen A, Sng LH,  
543 Stakenas P, Toit K, Varaine F, Vukovic D, et al. 2015. Evolutionary history  
544 and global spread of the *Mycobacterium tuberculosis* Beijing lineage. Nat  
545 Genet 47:242-9.
- 546 6. Mathee K, Narasimhan G, Valdes C, Qiu X, Matewish JM, Koehrsen M,  
547 Rokas A, Yandava CN, Engels R, Zeng E, Olavarietta R, Doud M, Smith  
548 RS, Montgomery P, White JR, Godfrey PA, Kodira C, Birren B, Galagan  
549 JE, Lory S. 2008. Dynamics of *Pseudomonas aeruginosa* genome  
550 evolution. Proc Natl Acad Sci USA 105:3100-5.
- 551 7. Koser CU, Holden MT, Ellington MJ, Cartwright EJ, Brown NM, Ogilvy-  
552 Stuart AL, Hsu LY, Chewapreecha C, Croucher NJ, Harris SR, Sanders  
553 M, Enright MC, Dougan G, Bentley SD, Parkhill J, Fraser LJ, Betley JR,  
554 Schulz-Trieglaff OB, Smith GP, Peacock SJ. 2012. Rapid whole-genome  
555 sequencing for investigation of a neonatal MRSA outbreak. N Engl J Med  
556 366:2267-75.

- 557 8. Buhl M, Kastle C, Geyer A, Autenrieth IB, Peter S, Willmann M. 2019.  
558 Molecular evolution of extensively drug-resistant (XDR) *Pseudomonas*  
559 *aeruginosa* strains from patients and hospital environment in a prolonged  
560 outbreak. *Front Microbiol* 10:1742.
- 561 9. Marsh JW, Mustapha MM, Griffith MP, Evans DR, Ezeonwuka C, Pasculle  
562 AW, Shutt KA, Sundermann A, Ayres AM, Shields RK, Babiker A, Cooper  
563 VS, Van Tyne D, Harrison LH. 2019. Evolution of outbreak-causing  
564 carbapenem-resistant *Klebsiella pneumoniae* ST258 at a tertiary care  
565 hospital over 8 years. *mBio* 10.
- 566 10. French CE, Coope C, Conway L, Higgins JP, McCulloch J, Okoli G, Patel  
567 BC, Oliver I. 2017. Control of carbapenemase-producing  
568 *Enterobacteriaceae* outbreaks in acute settings: an evidence review. *J*  
569 *Hosp Infect* 95:3-45.
- 570 11. Aujoulat F, Roger F, Bourdier A, Lotthe A, Lamy B, Marchandin H, Jumas-  
571 Bilak E. 2012. From environment to man: genome evolution and  
572 adaptation of human opportunistic bacterial pathogens. *Genes* 3:191-232.
- 573 12. Lyczak JB, Cannon CL, Pier GB. 2000. Establishment of *Pseudomonas*  
574 *aeruginosa* infection: lessons from a versatile opportunist. *Microbes Infect*  
575 2:1051-60.
- 576 13. Breidenstein EBM, de la Fuente-Núñez C, Hancock REW. 2011.  
577 *Pseudomonas aeruginosa*: all roads lead to resistance. *Trends Microbiol*  
578 19:419-426.

- 579 14. CDC. 2019. Antibiotic Resistance Threats in the United States.  
580 Department of Health and Human Services, CDC; 2019., Atlanta, GA:  
581 U.S.
- 582 15. Hota S, Hirji Z, Stockton K, Lemieux C, Dedier H, Wolfaardt G, Gardam  
583 MA. 2009. Outbreak of multidrug-resistant *Pseudomonas aeruginosa*  
584 colonization and infection secondary to imperfect intensive care unit room  
585 design. Infect Control Hosp Epidemiol 30:25-33.
- 586 16. Horcajada JP, Montero M, Oliver A, Sorli L, Luque S, Gomez-Zorrilla S,  
587 Benito N, Grau S. 2019. Epidemiology and treatment of multidrug-resistant  
588 and extensively drug-resistant *Pseudomonas aeruginosa* infections. Clin  
589 Microbiol Rev 32.
- 590 17. Deleo FR, Chen L, Porcella SF, Martens CA, Kobayashi SD, Porter AR,  
591 Chavda KD, Jacobs MR, Mathema B, Olsen RJ, Bonomo RA, Musser JM,  
592 Kreiswirth BN. 2014. Molecular dissection of the evolution of carbapenem-  
593 resistant multilocus sequence type 258 *Klebsiella pneumoniae*. Proc Natl  
594 Acad Sci USA 111:4988-93.
- 595 18. Marvig RL, Johansen HK, Molin S, Jelsbak L. 2013. Genome analysis of a  
596 transmissible lineage of *Pseudomonas aeruginosa* reveals pathoadaptive  
597 mutations and distinct evolutionary paths of hypermutators. PLoS Genet  
598 9:e1003741.
- 599 19. Martin K, Baddal B, Mustafa N, Perry C, Underwood A, Constantidou C,  
600 Loman N, Kenna DT, Turton JF. 2013. Clusters of genetically similar

- 601 isolates of *Pseudomonas aeruginosa* from multiple hospitals in the UK. J  
602 Med Microbiol 62:988-1000.
- 603 20. Teixeira P, Tacao M, Alves A, Henriques I. 2016. Antibiotic and metal  
604 resistance in a ST395 *Pseudomonas aeruginosa* environmental isolate: A  
605 genomics approach. Mar Pollut Bull 110:75-81.
- 606 21. Schelstraete P, Van Daele S, De Boeck K, Proesmans M, Lebecque P,  
607 Leclercq-Foucart J, Malfroot A, Vaneechoutte M, De Baets F. 2008.  
608 *Pseudomonas aeruginosa* in the home environment of newly infected  
609 cystic fibrosis patients. Eur Respir J 31:822-9.
- 610 22. Heirali A, McKeon S, Purighalla S, Storey DG, Rossi L, Costilhes G,  
611 Drews SJ, Rabin HR, Surette MG, Parkins MD. 2016. Assessment of the  
612 microbial constituents of the home environment of individuals with cystic  
613 fibrosis (CF) and their association with lower airways infections. PLoS One  
614 11:e0148534.
- 615 23. Petitjean M, Martak D, Silvant A, Bertrand X, Valot B, Hocquet D. 2017.  
616 Genomic characterization of a local epidemic *Pseudomonas aeruginosa*  
617 reveals specific features of the widespread clone ST395. Microb Genom  
618 3:e000129.
- 619 24. Jeanvoine A, Meunier A, Puja H, Bertrand X, Valot B, Hocquet D. 2019.  
620 Contamination of a hospital plumbing system by persister cells of a  
621 copper-tolerant high-risk clone of *Pseudomonas aeruginosa*. Water Res  
622 157:579-586.

- 623 25. Treepong P, Kos VN, Guyeux C, Blanc DS, Bertrand X, Valot B, Hocquet  
624 D. 2018. Global emergence of the widespread *Pseudomonas aeruginosa*  
625 ST235 clone. Clin Microbiol Infect 24:258-266.
- 626 26. Matz C, Kjelleberg S. 2005. Off the hook - how bacteria survive protozoan  
627 grazing. Trends Microbiol 13:302-7.
- 628 27. Thomas JM, Ashbolt NJ. 2011. Do free-living amoebae in treated drinking  
629 water systems present an emerging health risk? Environ Sci Technol  
630 45:860-9.
- 631 28. Cateau E, Imbert C, Rodier MH. 2008. *Hartmannella vermiformis* can be  
632 permissive for *Pseudomonas aeruginosa*. Lett Appl Microbiol 47:475-7.
- 633 29. Hao X, Luthje F, Ronn R, German NA, Li X, Huang F, Kisaka J, Huffman  
634 D, Alwathnani HA, Zhu YG, Rensing C. 2016. A role for copper in  
635 protozoan grazing - two billion years selecting for bacterial copper  
636 resistance. Mol Microbiol 102:628-641.
- 637 30. Donlan RM, Forster T, Murga R, Brown E, Lucas C, Carpenter J, Fields B.  
638 2005. *Legionella pneumophila* associated with the protozoan  
639 *Hartmannella vermiformis* in a model multi-species biofilm has reduced  
640 susceptibility to disinfectants. Biofouling 21:1-7.
- 641 31. Sun S, Noorian P, McDougald D. 2018. Dual role of mechanisms involved  
642 in resistance to predation by protozoa and virulence to humans. Front  
643 Microbiol 9:1017.
- 644 32. Department of Health UK. 2016. Health Technical Memorandum 04-01  
645 Part A: Design, installation and commissioning.

- 646 [https://assets.publishing.service.gov.uk/government/uploads/system/uploa](https://assets.publishing.service.gov.uk/government/uploads/system/uploads/attachment_data/file/524880/DH_HTM_0401_PART_A_acc.pdf)  
647 [ds/attachment\\_data/file/524880/DH\\_HTM\\_0401\\_PART\\_A\\_acc.pdf](https://assets.publishing.service.gov.uk/government/uploads/system/uploads/attachment_data/file/524880/DH_HTM_0401_PART_A_acc.pdf).
- 648 33. Smith EE, Buckley DG, Wu Z, Saenphimmachak C, Hoffman LR,  
649 D'Argenio DA, Miller SI, Ramsey BW, Speert DP, Moskowitz SM, Burns  
650 JL, Kaul R, Olson MV. 2006. Genetic adaptation by *Pseudomonas*  
651 *aeruginosa* to the airways of cystic fibrosis patients. *Proc Natl Acad Sci*  
652 *USA* 103:8487-92.
- 653 34. Li G, Lu CD. 2018. Molecular characterization and regulation of operons  
654 for asparagine and aspartate uptake and utilization in *Pseudomonas*  
655 *aeruginosa*. *Microbiology* 164:205-216.
- 656 35. Thomas SR, Ray A, Hodson ME, Pitt TL. 2000. Increased sputum amino  
657 acid concentrations and auxotrophy of *Pseudomonas aeruginosa* in  
658 severe cystic fibrosis lung disease. *Thorax* 55:795-7.
- 659 36. Rohmer L, Hocquet D, Miller SI. 2011. Are pathogenic bacteria just  
660 looking for food? Metabolism and microbial pathogenesis. *Trends*  
661 *Microbiol* 19:341-348.
- 662 37. King JD, Kocincova D, Westman EL, Lam JS. 2009. Review:  
663 Lipopolysaccharide biosynthesis in *Pseudomonas aeruginosa*. *Innate*  
664 *Immun* 15:261-312.
- 665 38. Maldonado RF, Sa-Correia I, Valvano MA. 2016. Lipopolysaccharide  
666 modification in Gram-negative bacteria during chronic infection. *FEMS*  
667 *Microbiol Rev* 40:480-93.



- 668 39. Magiorakos AP, Srinivasan A, Carey RB, Carmeli Y, Falagas ME, Giske  
669 CG, Harbarth S, Hindler JF, Kahlmeter G, Olsson-Liljequist B, Paterson  
670 DL, Rice LB, Stelling J, Struelens MJ, Vatopoulos A, Weber JT, Monnet  
671 DL. 2012. Multidrug-resistant, extensively drug-resistant and pandrug-  
672 resistant bacteria: an international expert proposal for interim standard  
673 definitions for acquired resistance. *Clin Microbiol Infect* 18:268-281.
- 674 40. Hocquet D, Bertrand X, Köhler T, Talon D, Plésiat P. 2003. Genetic and  
675 phenotypic variations of a resistant *Pseudomonas aeruginosa* epidemic  
676 clone. *Antimicrob Agents Chemother* 47:1887-94.
- 677 41. Skurnik D, Roux D, Cattoir V, Danilchanka O, Lu X, Yoder-Himes DR, Han  
678 K, Guillard T, Jiang D, Gaultier C, Guerin F, Aschard H, Leclercq R,  
679 Mekalanos JJ, Lory S, Pier GB. 2013. Enhanced *in vivo* fitness of  
680 carbapenem-resistant *oprD* mutants of *Pseudomonas aeruginosa*  
681 revealed through high-throughput sequencing. *Proc Natl Acad Sci USA*  
682 110:20747-52.
- 683 42. Tian ZX, Yi XX, Cho A, O'Gara F, Wang YP. 2016. CpxR activates  
684 MexAB-OprM efflux pump expression and enhances antibiotic resistance  
685 in both laboratory and clinical *nalB*-type isolates of *Pseudomonas*  
686 *aeruginosa*. *PLoS Pathog* 12:e1005932.
- 687 43. Hocquet D, Nordmann P, El Garch F, Cabanne L, Plésiat P. 2006.  
688 Involvement of the MexXY-OprM efflux system in emergence of cefepime  
689 resistance in clinical strains of *Pseudomonas aeruginosa*. *Antimicrob*  
690 *Agents Chemother* 50:1347-51.

- 691 44. Piddock LJ. 2006. Multidrug-resistance efflux pumps - not just for  
692 resistance. *Nat Rev Microbiol* 4:629-36.
- 693 45. Hirakata Y, Kondo A, Hoshino K, Yano H, Arai K, Hirotsu A, Kunishima H,  
694 Yamamoto N, Hatta M, Kitagawa M, Kohno S, Kaku M. 2009. Efflux pump  
695 inhibitors reduce the invasiveness of *Pseudomonas aeruginosa*. *Int J*  
696 *Antimicrob Agents* 34:343-6.
- 697 46. Sanchez P, Linares JF, Ruiz-Diez B, Campanario E, Navas A, Baquero F,  
698 Martinez JL. 2002. Fitness of in vitro selected *Pseudomonas aeruginosa*  
699 *nalB* and *nfxB* multidrug resistant mutants. *J Antimicrob Chemother*  
700 50:657-664.
- 701 47. Vettoretti L, Plesiat P, Muller C, El Garch F, Phan G, Attree I, Ducruix A,  
702 Llanes C. 2009. Efflux unbalance in *Pseudomonas aeruginosa* isolates  
703 from cystic fibrosis patients. *Antimicrob Agents Chemother* 53:1987-97.
- 704 48. Hirakata Y, Srikumar R, Poole K, Gotoh N, Suematsu T, Kohno S,  
705 Kamihira S, Hancock RE, Speert DP. 2002. Multidrug efflux systems play  
706 an important role in the invasiveness of *Pseudomonas aeruginosa*. *J Exp*  
707 *Med* 196:109-118.
- 708 49. Hocquet D, Petitjean M, Rohmer L, Valot B, Kulasekara HD, Bedel E,  
709 Bertrand X, Plesiat P, Kohler T, Pantel A, Jacobs MA, Hoffman LR, Miller  
710 SI. 2016. Pyomelanin-producing *Pseudomonas aeruginosa* selected  
711 during chronic infections have a large chromosomal deletion which  
712 confers resistance to pyocins. *Environ Microbiol* 18:3482-3493.

- 713 50. Tsuchiya K, Cao YY, Kurokawa M, Ashino K, Yomo T, Ying BW. 2018. A  
714 decay effect of the growth rate associated with genome reduction in  
715 *Escherichia coli*. BMC Microbiol 18:101.
- 716 51. Binet R, Maurelli AT. 2005. Fitness cost due to mutations in the 16S rRNA  
717 associated with spectinomycin resistance in *Chlamydia psittaci* 6BC.  
718 Antimicrob Agents Chemother 49:4455-64.
- 719 52. Rohr U, Weber S, Michel R, Selenka F, Wilhelm M. 1998. Comparison of  
720 free-living amoebae in hot water systems of hospitals with isolates from  
721 moist sanitary areas by identifying genera and determining temperature  
722 tolerance. Appl Environ Microbiol 64:1822-4.
- 723 53. Bankevich A, Nurk S, Antipov D, Gurevich AA, Dvorkin M, Kulikov AS,  
724 Lesin VM, Nikolenko SI, Pham S, Pribelski AD, Pyshkin AV, Sirotkin AV,  
725 Vyahhi N, Tesler G, Alekseyev MA, Pevzner PA. 2012. SPAdes: a new  
726 genome assembly algorithm and its applications to single-cell sequencing.  
727 J Comput Biol 19:455-77.
- 728 54. Kolmogorov M, Raney B, Paten B, Pham S. 2014. Ragout - a reference-  
729 assisted assembly tool for bacterial genomes. Bioinformatics 30:i302-9.
- 730 55. Kurtz S, Phillippy A, Delcher AL, Smoot M, Shumway M, Antonescu C,  
731 Salzberg SL. 2004. Versatile and open software for comparing large  
732 genomes. Genome Biol 5:R12.
- 733 56. Hyatt D, Chen GL, Locascio PF, Land ML, Larimer FW, Hauser LJ. 2010.  
734 Prodigal: prokaryotic gene recognition and translation initiation site  
735 identification. BMC Bioinformatics 11:119.

- 736 57. Altschul SF, Gish W, Miller W, Myers EW, Lipman DJ. 1990. Basic local  
737 alignment search tool. *J Mol Biol* 215:403-10.
- 738 58. Zankari E, Hasman H, Cosentino S, Vestergaard M, Rasmussen S, Lund  
739 O, Aarestrup FM, Larsen MV. 2012. Identification of acquired antimicrobial  
740 resistance genes. *J Antimicrob Chemother* 67:2640-4.
- 741 59. Chen L, Xiong Z, Sun L, Yang J, Jin Q. 2012. VFDB 2012 update: toward  
742 the genetic diversity and molecular evolution of bacterial virulence factors.  
743 *Nucleic Acids Res* 40:641-5.
- 744 60. Liao Y, Smyth GK, Shi W. 2014. featureCounts: an efficient general  
745 purpose program for assigning sequence reads to genomic features.  
746 *Bioinformatics* 30:923-30.
- 747 61. Rohart F, Gautier B, Singh A, Le Cao KA. 2017. mixOmics: An R package  
748 for 'omics feature selection and multiple data integration. *PLoS Comput  
749 Biol* 13:e1005752.
- 750 62. Treepong P, Guyeux C, Meunier A, Couchoud C, Hocquet D, Valot B.  
751 2018. *panISa: ab initio* detection of insertion sequences in bacterial  
752 genomes from short read sequence data. *Bioinformatics* 34:3795-3800.
- 753 63. Ronquist F, Teslenko M, van der Mark P, Ayres DL, Darling A, Hohna S,  
754 Larget B, Liu L, Suchard MA, Huelsenbeck JP. 2012. MrBayes 3.2:  
755 efficient Bayesian phylogenetic inference and model choice across a large  
756 model space. *Syst Biol* 61:539-42.
- 757 64. CLSI. 2015. Method for dilution antimicrobial susceptibility tests for  
758 bacteria that grow aerobically. Approved standard - tenth edition, CLSI

759 document M7-A10. National Committee for Clinical Laboratory Standards,  
760 Wayne, Pa.

761 65. Thomas V, Herrera-Rimann K, Blanc DS, Greub G. 2006. Biodiversity of  
762 amoebae and amoeba-resisting bacteria in a hospital water network. Appl  
763 Environ Microbiol 72:2428-38.

764

765 **Figure legends**

766 **Figure 1. Temporal data and phylogenetic tree of the *P. aeruginosa***  
767 **Besançon Epidemic Strain (BES) in a University Hospital.** (A) Number of new  
768 patients contaminated by or infected with *P. aeruginosa* BES (belonging to the  
769 widespread clone ST395) by year during the 12 years of the outbreak in the  
770 University Hospital of Besançon (France). (B) The left panel shows the tree built  
771 with MrBayes using the following parameters: GTR substitution model and  
772 1,000,000 cycles with the MCMC algorithm, with sampling of the chain every  
773 1,000 cycles. We defined two major clades, 1 and 2, with clade 1 divided into  
774 four sub-clades, 1a to 1d. The isolates in green and red are early (before January  
775 2001) and late (after January 2001) isolates, respectively. Isolates in black were  
776 outgroups. The right panel indicates non-synonymous mutations that affected  
777 amino-acid metabolism, OprD, or lipopolysaccharide (LPS) biosynthesis. Fs,  
778 frameshift. Mutations shown in bold indicate non-O:6 isolates.

779

780 **Figure 2. *P. aeruginosa* BES is tolerant to copper- ions and proliferates in**  
781 **the free-living amoebae *Vermamoeba vermiformis*.** (A) Survival of  
782 *P. aeruginosa* BES-4, with or without GI-7, in a 150 µg/L copper (II) sulphate  
783 solution after 24 h of incubation shown on a decimal logarithm scale. Values are  
784 shown as the mean ratio ± SD (≥ 5 independent experiments). PCR experiments  
785 confirmed that the genomes of PAO1, PA14, and PA1646 (ST235) did not harbor  
786 GI-7. (B) The *P. aeruginosa* BES (ST395) proliferates in the free-living amoebae

787 *Vermamoeba vermiformis*. The reference strain *V. vermiformis* 172A was  
788 inoculated with *P. aeruginosa* strains at a multiplicity of infection (MOI) of 5 and  
789 incubated for 24 h at 25°C. Values are shown as the mean ratio  $\pm$  SD (3  
790 technical replicates and  $\geq$  3 biological replicates). ANOVA (analysis of variance)  
791 with a Tukey HSD (honestly significant difference) test: a-b, a-c, a-d, b-c, b-d,  
792 and c-d are significantly different;  $P < 0.01$ . For the two panels, y-axis represent  
793 the ratio of the quantification on LB agar plates of the living cells at the end of the  
794 experiments and that of the initial inoculum.

795

796 **Figure 3. *P. aeruginosa* BES attenuates the overexpression of the RND**  
797 **efflux pump MexAB-OprM during its spread via parallel and convergent**  
798 **evolution.** (A) Mutations affecting *mexAB-oprM* expression in *P. aeruginosa*  
799 BES in the regulatory network of *mexAB-oprM*. Local repressor MexR ensures  
800 basal expression of the *mexAB-oprM* operon. The repressor NalD directly binds  
801 to the proximal promoter of the operon. NalC indirectly modulates *mexAB-oprM*  
802 expression by repressing the expression of the *armZ* gene, the product of which  
803 acts as an anti-repressor of MexR. Mutations in these three repressors have  
804 been reported in *nalB*, *nalD*, and *nalC* mutants, respectively. Two direct  
805 activators of *mexAB-oprM* are CpxR and BrIR. Finally, the products of four other  
806 genes have been reported to have an indirect negative (*mexT*, *rocS1/2-A2*,  
807 *PA3225*) or positive (*ampR*) impact on *mexAB-oprM* expression (64). Red  
808 triangles indicate mutations occurring in regions involved in the regulation of  
809 *mexAB-OprM* expression, with the number of the affected BES isolates in

810 parenthesis. (B). Expression of *mexB* in isolates of BES sorted by the type of  
811 mutation in the regulatory pathway of *mexAB-oprM*. ANOVA with a Tukey HSD  
812 test: a-b, a-c, and b-c are significantly different;  $P < 0.001$ . (C) Attenuation of  
813 *mexAB-oprM* overexpression in *P. aeruginosa* BES over time. Pearson  
814 correlation between *mexB* expression and the time of isolation:  $-0.547$  ( $P = 1.87$   
815  $\times 10^{-5}$ ).

816

817 **Figure 4. The fitness of *P. aeruginosa* BES decreases in relation to its**  
818 **genome size during a hospital-associated outbreak.** (A) *P. aeruginosa*  
819 isolates of BES were cocultured in Luria-Bertani broth with the reference isolate  
820 *P. aeruginosa* BES-4 $\Delta$ GI-7. After 48 h of incubation, we determined the  
821 *copB/mutL* ratio, which represents the proportion of the tested isolate of BES  
822 (harboring *copB* and *mutL*) in the co-culture relative to that of the isolate BES-  
823 4 $\Delta$ GI-7 (harboring only *mutL*) and used it to calculate the competition index (CI),  
824 as described in Materials and Methods. Data are shown as the mean  $\pm$  SD of two  
825 technical replicates, indicative of three biological replicates. The CI of each BES  
826 isolate is plotted against its time of isolation. The dotted line (CI = 0.5) represents  
827 an equal fitness. Pearson correlation test between the CI and the time of  
828 isolation:  $-0.379$  ( $P = 0.00465$ ). (B) The fitness of *P. aeruginosa* BES correlates  
829 with the size of the genome. Pearson correlation test between the CI and the  
830 number of genes in the genome:  $0.525$  ( $P = 4.7 \times 10^{-5}$ ).



1 **Figures and Tables**

2

3 **Figure 1A**

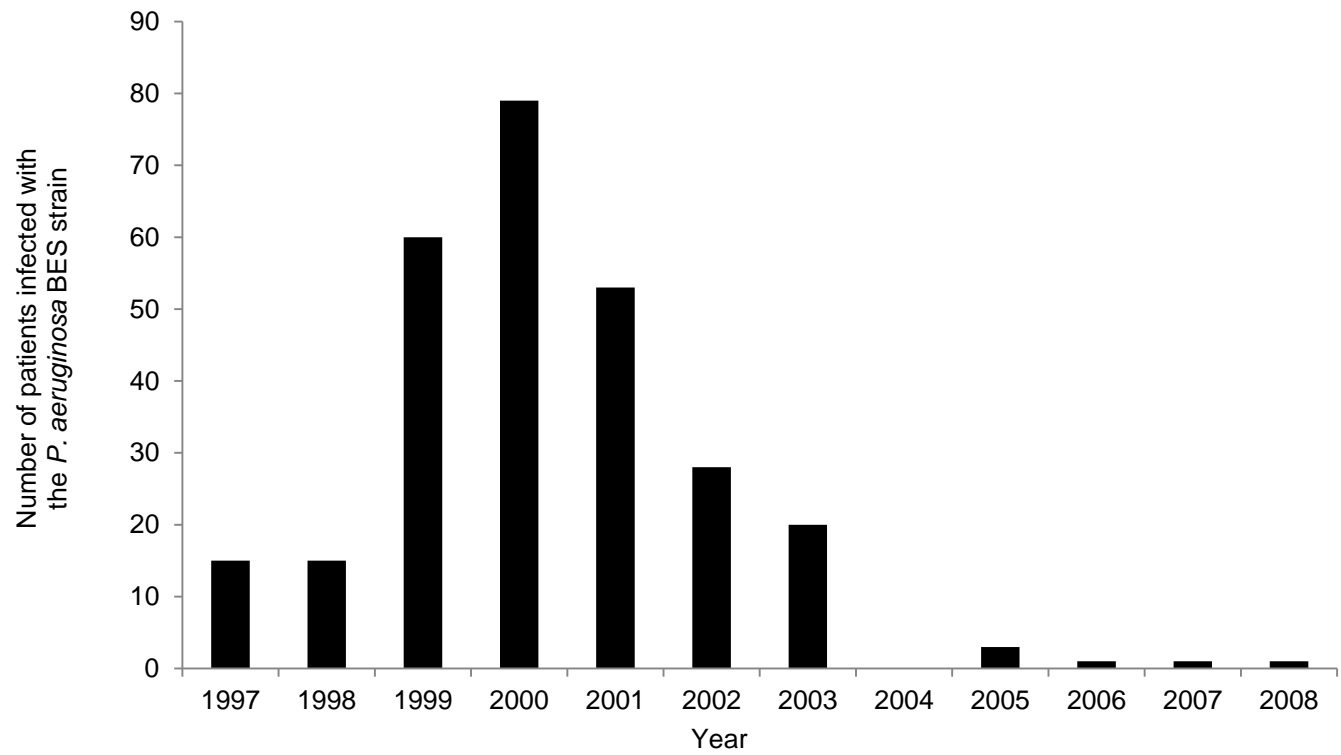

4 Figure 1B

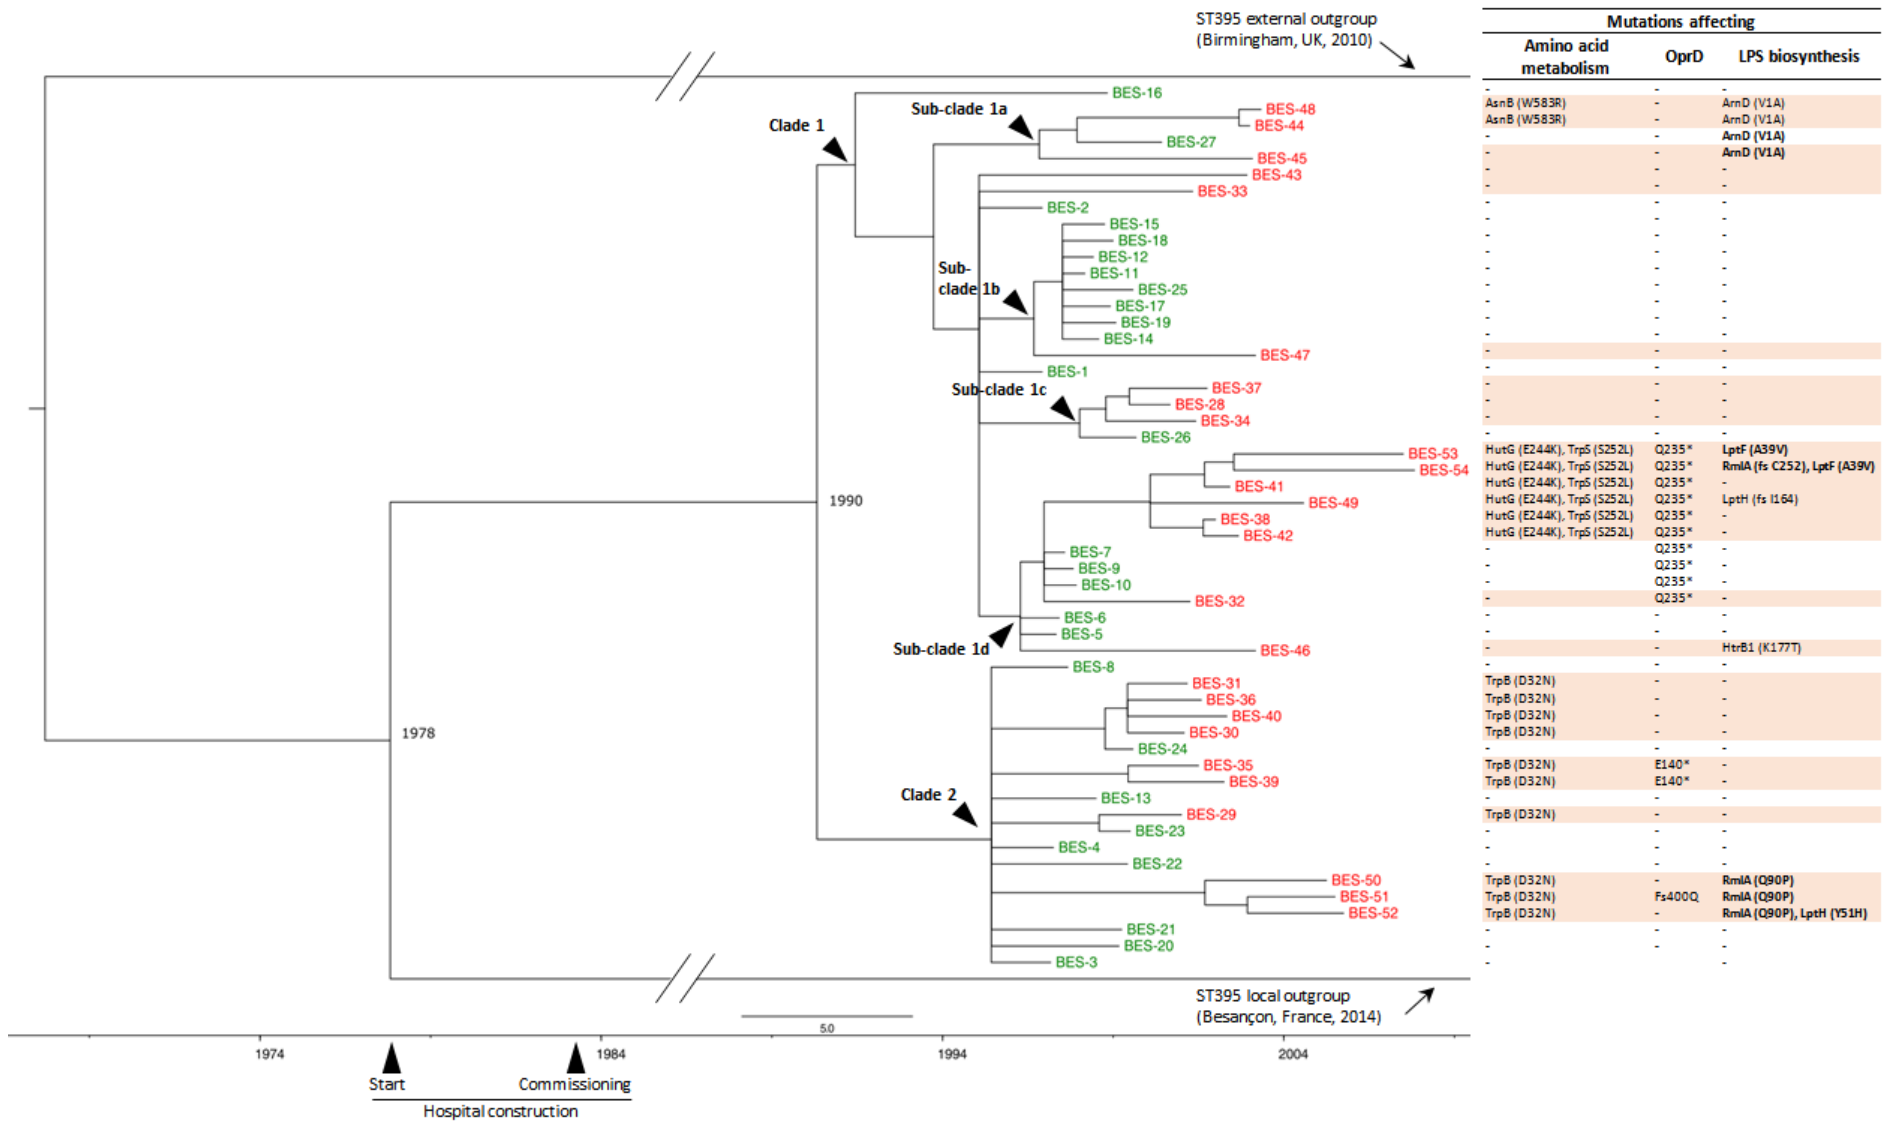

5 **Figure 2**

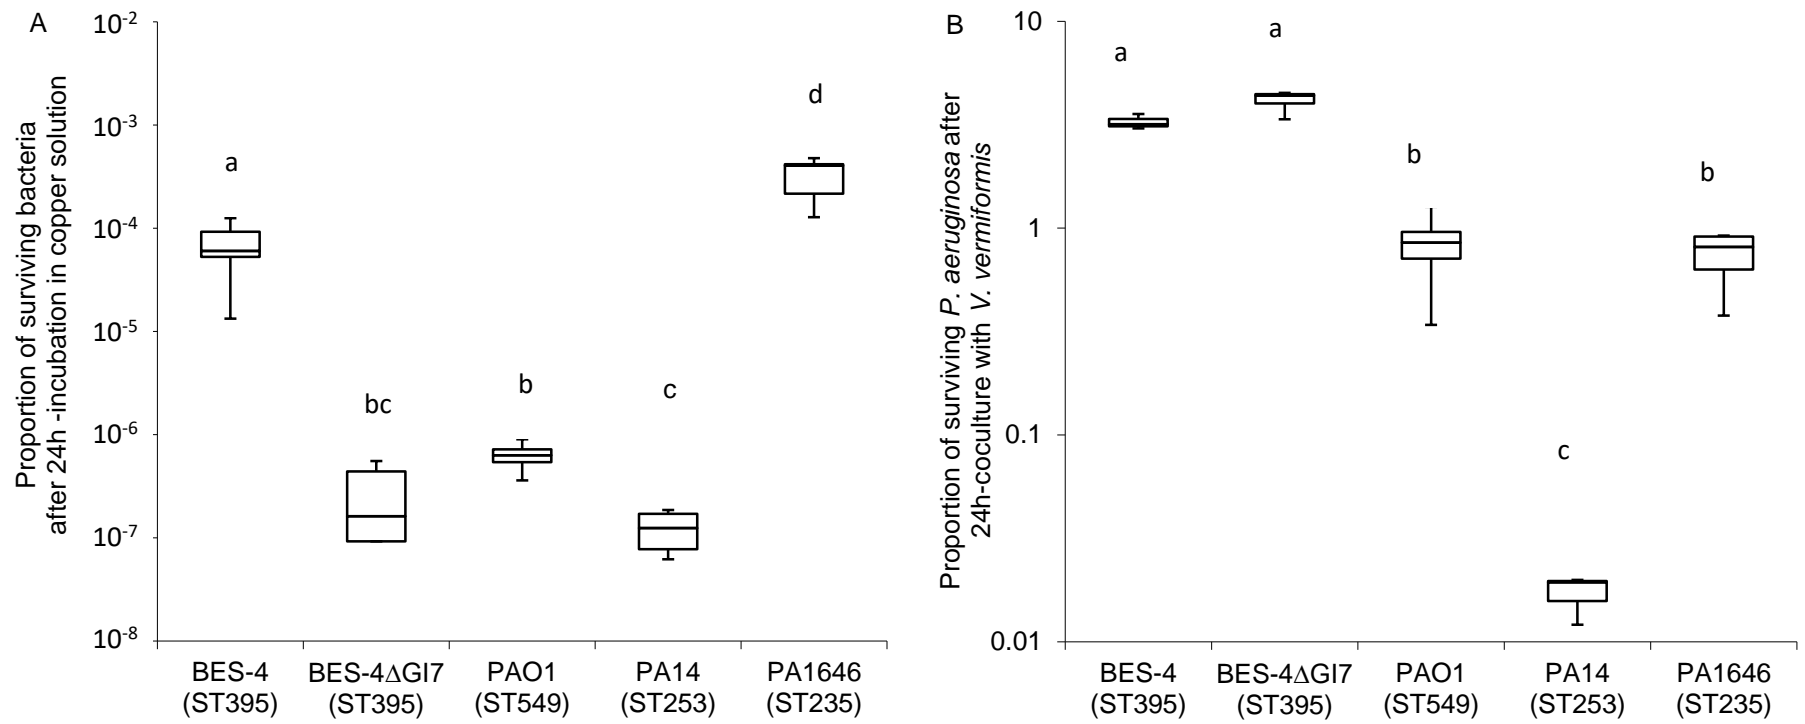

6 **Figure 3A**

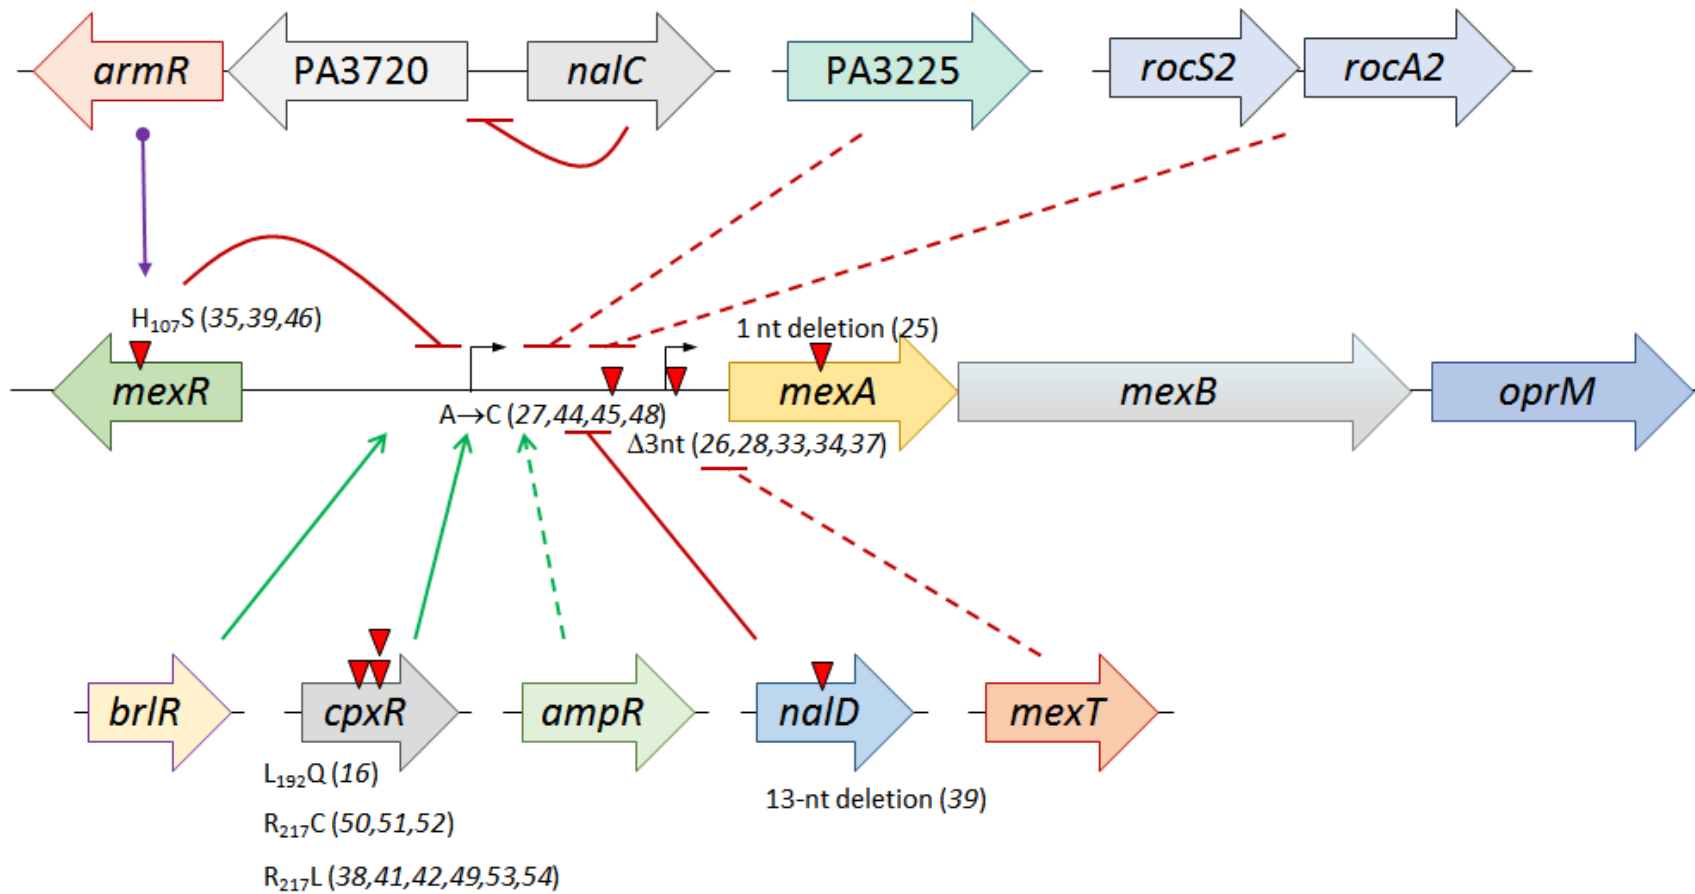

7  
8

9 **Figures 3B and 3C**  
10

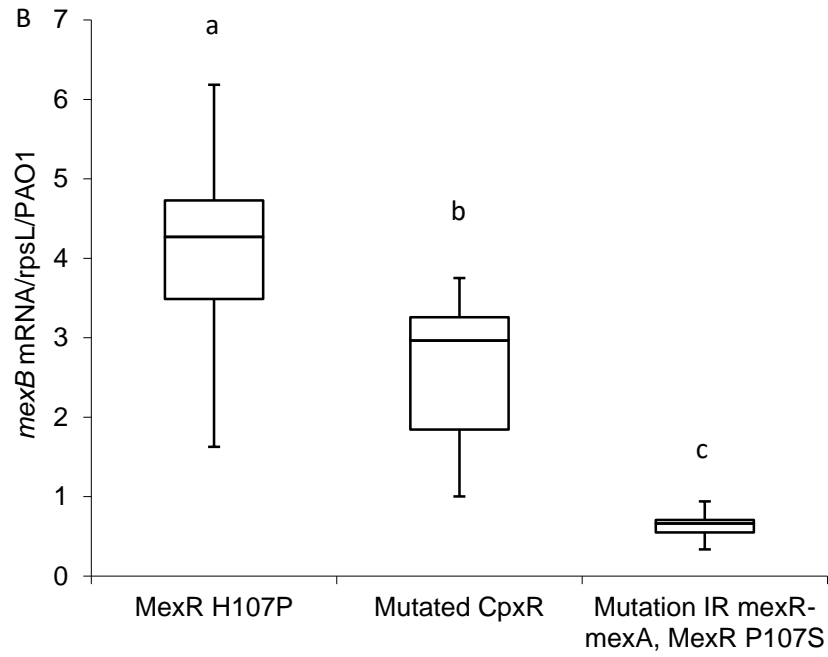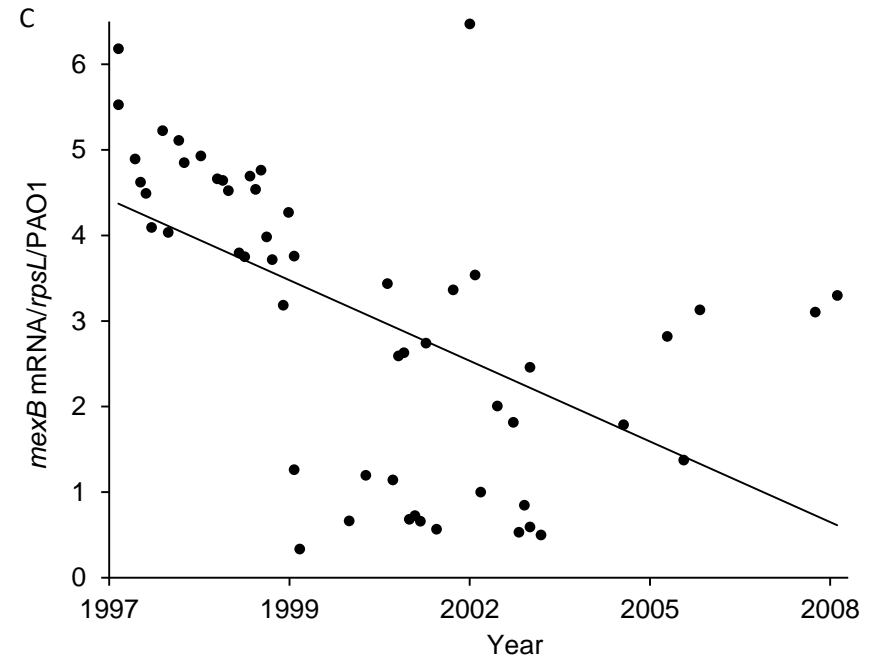

11

12 **Figure 4**

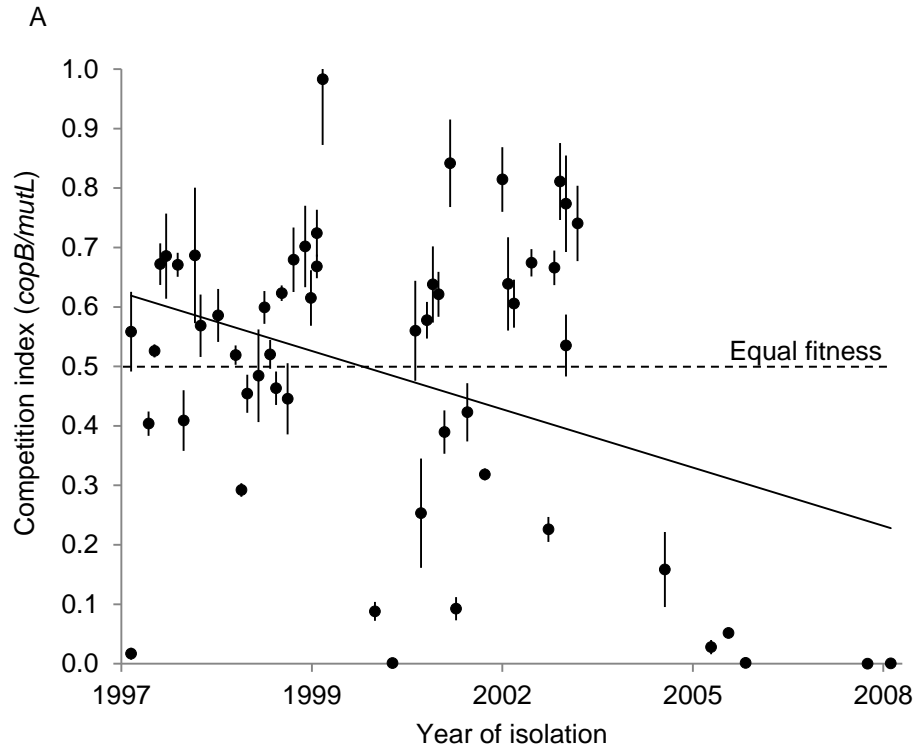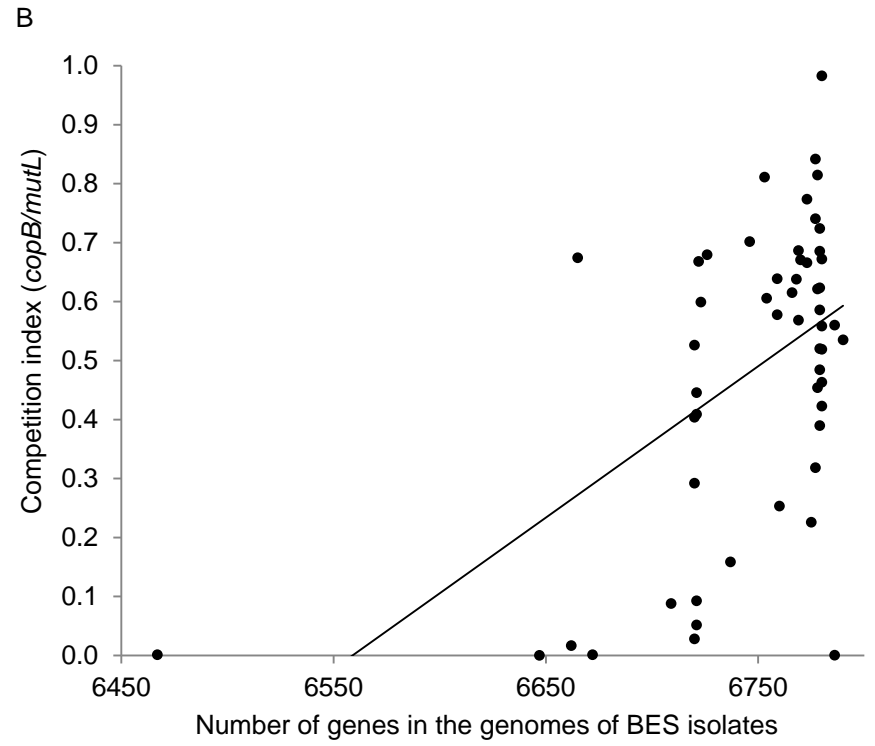

Source: https://www.biorxiv.org/content/10.1101/2020.09.21.307538v1.full.pdf
